# Supplementary material for: Fusion Transcripts of Adjacent Genes: New Insights into the World of Human Complex Transcripts in Cancer
Source: MDPI journal article supplement (doi:10.3390/ijms20215252), 2019-10-23
Supplement: s1 [file s1]

| <b>FuTAGs reported in<br/>ChiTaRS 3.1 DB (n=25)</b> | <b>ConjoinG DB<br/>(n=800)</b> | <b>Notes</b>                                |
|-----------------------------------------------------|--------------------------------|---------------------------------------------|
| PPAN-P2RY11                                         | Yes                            | NM_001040664;<br>NM_001198690               |
| JMJD7-PLA2G4B                                       | No                             | NM_001198588;<br>NM_005090                  |
| NME1-NME2                                           | Yes                            | NM_001018136;<br>NR_037149                  |
| ANKHD1-EIF4EBP3                                     | Yes                            | NM_020690                                   |
| PRR5 ARHGAP8                                        | Yes                            | NM_181334                                   |
| MEF2B-BORCS8                                        | No                             | NM_005919                                   |
| PALM2-AKAP2                                         | Yes                            | NM_007203;<br>NM_147150                     |
| MAGEA10-MAGEA5                                      | Yes                            | NM_001204811                                |
| MROH7-TTC4                                          | Yes                            | NR_037639;<br>NR_037640;<br>NR_037641       |
| PTGES3L-AARSD1                                      | No                             | NM_001136042;<br>NM_025267                  |
| C8orf44-SGK3                                        | Yes                            | NM_001204173                                |
| FPGT-TNNI3K                                         | Yes                            | NM_001112808;<br>NM_001199327               |
| ZFP91-CNTF                                          | Yes                            | NR_024091                                   |
| STON1-GTF2A1L                                       | Yes                            | NM_001198593;<br>NM_001198594;<br>NM_172311 |
| SCARNA16-SEC14L1                                    | No                             | not available on<br>NCBI                    |
| SNHG4-MATR3                                         | No                             | not available on<br>NCBI                    |
| KLRC4-KLRK1                                         | Yes                            | NM_007360                                   |
| SNHG3-RCC1                                          | No                             | not available on<br>NCBI                    |
| TMEM189-UBE2V1                                      | Yes                            | NM_199203                                   |
| PGBD3-ERCC6                                         | No                             | not available on<br>NCBI                    |
| DNAJC25-GNG10                                       | Yes                            | NM_004125                                   |
| TRIM6-TRIM34                                        | Yes                            | NM_001003819                                |
| INS-IGF2                                            | Yes                            | NM_001042376;<br>NR_003512                  |
| TNFSF12-TNFSF13                                     | Yes                            | NM_172089                                   |
| ZNF559-ZNF177                                       | Yes                            | NM_001172650;<br>NM_001202425               |

Table S1
